# Supplementary material
Source: PubMed Central journal article supplement (PMC381013)

**Fig. S1. PcG stainings at the locus of insertion of the *Ab-Fab* transgene in larvae of the Ab14 line (cytological location 42F1) and in *w<sup>1118</sup>* controls.**

Immunostainings of polytene chromosomes were performed on both lines using anti-Polyhomeotic (PH), anti-Polycomb (PC) or anti-Pleiohomeotic (PHO) antibodies. The 42F1 locus of insertion of the *Ab-Fab* transgene (mapped by Immuno-FISH, as shown throughout the paper Figures) is indicated by an arrow. Left panels: staining of control *w<sup>1118</sup>* chromosomes shows no signal for the three proteins at 42F1. Right panels: staining of PcG proteins in the Ab14 line. Staining of PC and PHO shows that *Ab-Fab* is able to recruit both proteins, visible as an additional band compared to the control chromosomes. PH staining is shown in Figure 1B.

**Controls at the Ab14 locus: 42F1**

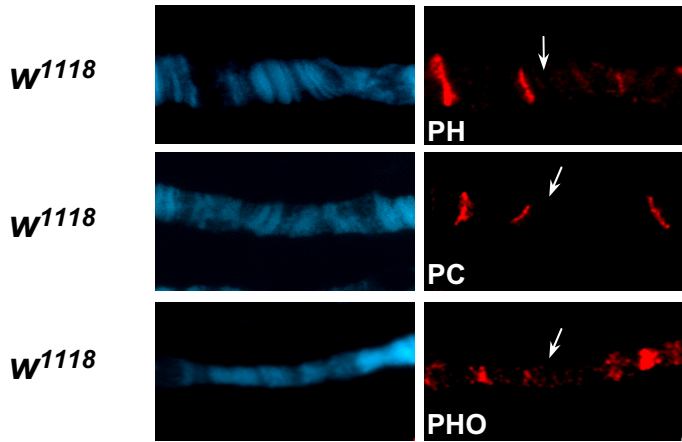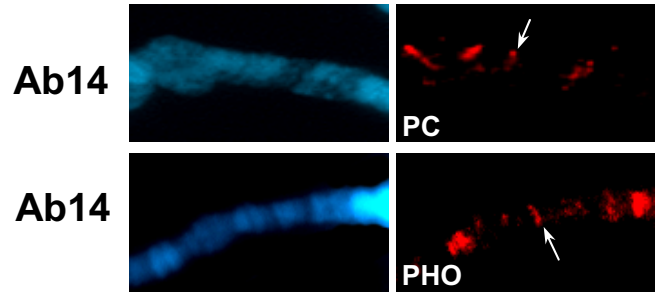

Supplement: 7600108s1.pdf [file 7600108s1.pdf]
