# Supplementary material
Source: PubMed Central journal article supplement (PMC381013)

**Fig. S2. PcG stainings of the locus of transgene insertion in the Midi1.1 line and in  $w^{1118}$  control larvae:**

Immunostainings of polytene chromosomes were performed on both lines using anti-Polyhomeotic (PH), anti-Polycomb (PC) or anti-Pleiohomeotic (PHO) antibodies. Left panels: in  $w^{1118}$  chromosomes, no signal is seen for any of the three proteins at the insertion site (indicated by an arrow). Right panels: an additional signal is detected for PH, PC or PHO proteins at the site of insertion of the transgene in the Midi1.1 line. The insertion site of the *Midi-Fab* transgene was mapped at 7D2 by standard PCR rescue techniques.

The *Midi-Fab* construct is able to recruit PH, PC and PHO proteins

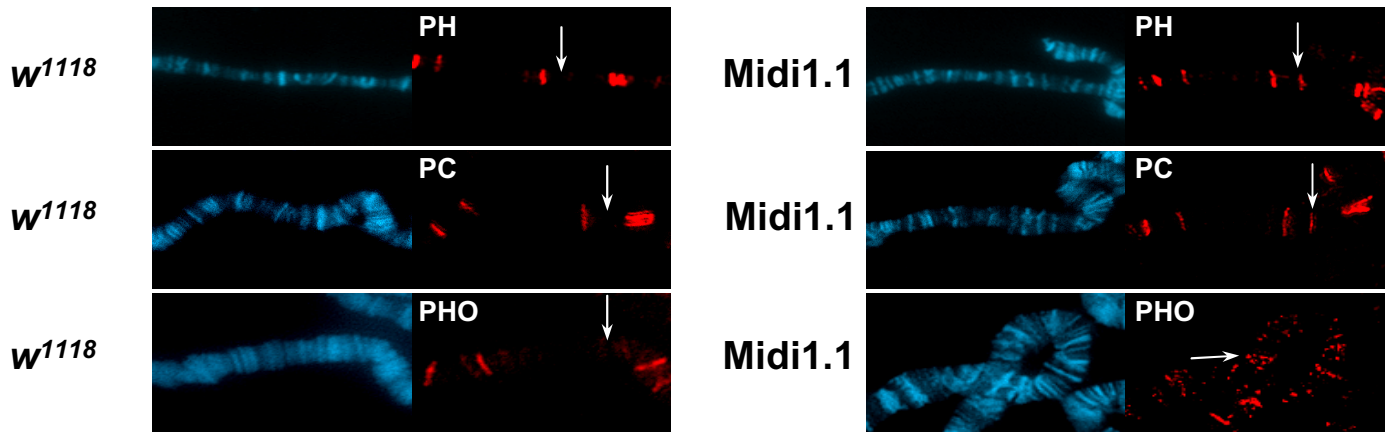

Supplement: 7600108s2.pdf [file 7600108s2.pdf]
