# Supplementary material
Source: PubMed Central journal article supplement (PMC381013)

**Fig. S4: Deletion of endogenous *Fab-7* has no effect on Ab14 activation:**

Representative eye picture of Ab14 flies, carrying the hsGAL4 driver as well as a homozygous deletion of the endogenous *Fab-7* element (*Fab-7<sup>l</sup>*) (Gyurkovics et al., 1990). Adult flies derived from GAL4 pulse activated embryos (right) are compared to non-activated controls (left). The *Fab-7* deletion has no detectable effect on the ability of Ab-*Fab* to maintain the active state.

**Reference:**

Gyurkovics, H., Gausz, J., Kummer, J. and Karch, F. (1990) A new homeotic mutation in the *Drosophila* bithorax complex removes a boundary separating two domains of regulation. *EMBO J.*, **9**, 2579-2585.

# Deletion of endogenous *Fab-7* element has no effect on Ab14 activation

Ab14;hsGAL4, *Fab-7*<sup>1</sup>

---

Embryonic Activation

-

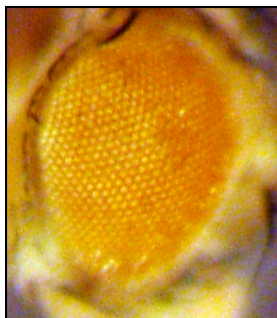

+

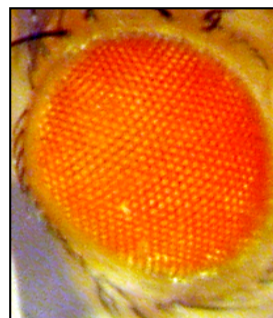

Supplement: 7600108s4.pdf [file 7600108s4.pdf]
