# Supplementary material
Source: PubMed Central journal article supplement (PMC381013)

**Fig. S5: PcG stainings at the locus of insertion of the  $\Delta Z-Fab$  construct in the  $\Delta Z14$  line (insertion at cytological location 31F1) or in control in  $w^{1118}$  larvae:**

Immunostainings of polytene chromosomes were performed on both lines using anti-Polyhomeotic (PH), anti-Polycomb (PC) or anti-Pleiohomeotic (PHO) antibodies. Left panels: staining of  $w^{1118}$  chromosomes shows no signal for the three proteins at the 31F1 locus of insertion of the  $\Delta Z-Fab$  transgene (the locus of insertion was mapped by Immuno-FISH, as shown throughout the paper Figures). Right panels: staining for PC and PHO of the  $\Delta Z-Fab$  line is shown (PH staining is already shown in Figure 1B).  $\Delta Z-Fab$  is able to recruit PC and PHO at the insertion site, as indicated by an arrow.

Controls at the  $\Delta Z14$  locus: 31F1

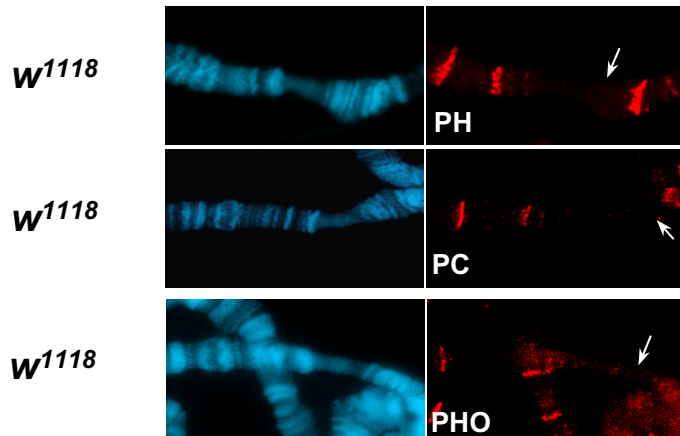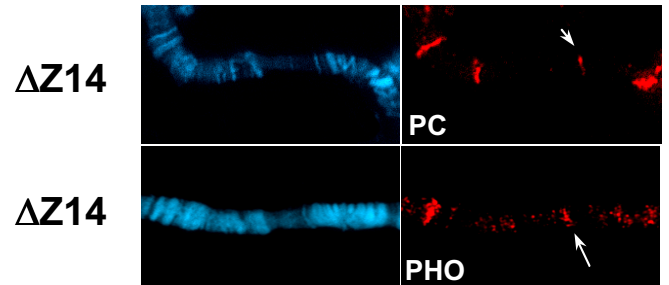

Supplement: 7600108s5.pdf [file 7600108s5.pdf]
